# Supplementary material for: Application of ZIF-8–graphene oxide sponge to a solid phase extraction method for the analysis of sex hormones in milk and milk products by high-performance liquid chromatography
Source: Royal Society of Chemistry journal article supplement (doi:10.1039/c8nj05940c), 2019-01-01
Supplement: c8nj05940c1.pdf [file c8nj05940c1.pdf]

## Supporting Information

### **Application of ZIF-8-graphene oxide sponge for solid phase extraction method to the analysis of sex hormones in milk and milk products by high-performance liquid chromatography**

Xuemei Wang<sup>a,b,\*</sup>, Juan Wang<sup>a</sup>, Tongtong Du<sup>a</sup>, Haixia Kou<sup>a</sup>, Xinzhen Du<sup>a,b</sup>, Xiaoquan Lu<sup>a,b</sup>

<sup>a</sup>College of Chemistry and Chemical Engineering, Northwest Normal University,

<sup>b</sup>Key Laboratory of Bioelectrochemistry & Environmental Analysis of Gansu Province,

Lanzhou 730070, P. R. China

#### Optimization of SPE conditions

\*Corresponding author, Tel: +86-931-7973035

*E-mail address:* wxm98@163.com (X.M. Wang)

To evaluate the extraction performance of the ZIF-8-GOS as SPE adsorbent, several SPE conditions were carefully investigated and optimized.

The elution solvent is very important in SPE in order to achieve excellent recovery. Methanol, acetonitrile, acetone, chloromethane, n-Hexane, and a certain proportion of methanol and water were studied. The results show chloromethane has better ability of eluting to two sex hormones (NDL and TTR), while it has no eluting ability to other three sex hormones (E1, E3 and DES). Acetonitrile, acetone and n-Hexane do not elute all sex hormones. Only a certain proportion of methanol and water can elute all analytes. As shown in Fig. S1-a, methanol/water = 60:40 (v/v) has the best recovery.

The volume of elution solvent is a crucial factor to obtain reliable analytical results. To investigate the effect of the extraction recovery, different ratios of methanol to water was used to elute. Fig. S1-b indicates that the maximal recoveries of all analytes are obtained when the elution volume is 1500  $\mu$ L. Hereby, 1500  $\mu$ L of methanol/water = 60:40 (v/v) is used for the following experiments.

Addition of salt into aqueous samples can decrease the solubility of nonpolar organic compounds in water, which could increase the distribution coefficient of the analytes to the SPME fiber and thus enhance extraction efficiency. Nevertheless, it could increase the viscosity and density of the solution, and decrease the diffusion rate of the analytes, which is unfavorable to the analytes transferring to the SPE adsorbent. Here, the salt concentration (NaCl, w/w %) was investigated from 0 to 25%. Fig. S1-c shows that there is no significant effect on the recovery when increasing the concentration of NaCl. Based on this, the salt was not added in this study.

**Figure S1.** The effect of (a) type of elution solvent; (b) the volume of elution solvent; (c) salt effect.

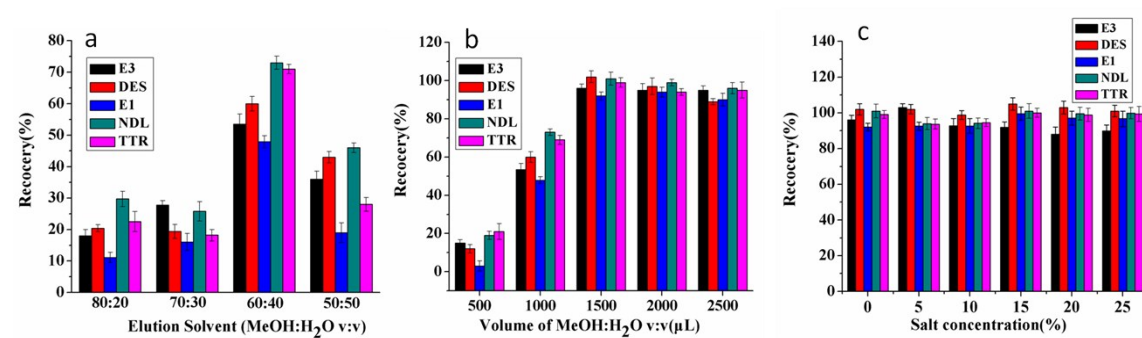

**Table S1** Chemical structures of five sex hormones considered in this work.

| Chemical | CAS Number | Structure                                                                            | Molecular weight |
|----------|------------|--------------------------------------------------------------------------------------|------------------|
| E1       | 2440-22-4  | 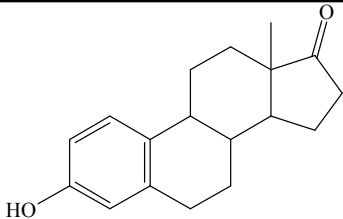   | 225.2            |
| E3       | 70321-86-7 |    | 846.8            |
| DES      | 3896-11-5  |   | 315.8            |
| NDL      | 3864-99-1  |  | 357.9            |
| TTR      | 25973-55-1 |  | 351.5            |

**Table S2** Analytical performance of the proposed method (n = 5).

| Analytes | Linear range<br>( $\mu\text{g L}^{-1}$ ) | r      | Precision (RSD %) |           | LOD<br>( $\mu\text{g L}^{-1}$ ) | LOQ<br>( $\mu\text{g L}^{-1}$ ) |
|----------|------------------------------------------|--------|-------------------|-----------|---------------------------------|---------------------------------|
|          |                                          |        | Intra-day         | Inter-day |                                 |                                 |
| E1       | 10-3000                                  | 0.9998 | 0.39              | 1.29      | 0.52                            | 1.75                            |
| E3       | 10-3000                                  | 0.9999 | 0.29              | 1.25      | 2.11                            | 6.97                            |
| DES      | 10-3000                                  | 0.9999 | 0.28              | 2.07      | 1.38                            | 4.57                            |
| NDL      | 5-3000                                   | 0.9998 | 0.38              | 3.86      | 0.65                            | 2.14                            |
| TTR      | 10-3000                                  | 0.9999 | 0.55              | 3.34      | 1.20                            | 3.90                            |
